# Supplementary material for: Heterogeneity of Altered Cytokine Levels Across the Clinical Spectrum of Diabetes in China
Source: PubMed Central journal article supplement — Diabetes Care. 2011 Jun 17;34(7):1639–41. doi: 10.2337/dc11-0039 (PMC3120206; doi:10.2337/dc11-0039), 2011-06-17
Supplement: supp_dc11-0039v110039_DC110039SupplementaryData.pdf [file supp_dc11-0039v110039_DC110039SupplementaryData.pdf]

SUPPLEMENTARY DATA

**Supplementary Table 1.** Clinical characteristics of study subjects

|                                                | NGT (N=196)        | T1D (N=53)                       | LADA (N=250)                      | T2D (N=285)                               |
|------------------------------------------------|--------------------|----------------------------------|-----------------------------------|-------------------------------------------|
| Male (%)                                       | 63.77(125/196)     | 75.47(40/53)                     | 62.00(155/250)                    | 62.81(179/285)                            |
| Age (yrs)                                      | 42.97±7.29         | 40.77±9.89                       | 50.50±11.91 <sup>***###</sup>     | 49.56±11.12 <sup>***###</sup>             |
| BMI (kg/m <sup>2</sup> )                       | 23.98±3.08         | 21.94±5.19 <sup>***</sup>        | 23.98±3.72 <sup>###</sup>         | 24.52±3.19 <sup>###</sup>                 |
| Waist circumference (cm)                       | 82.79±8.94         | 76.33±8.44 <sup>**</sup>         | 84.88±10.54 <sup>***###</sup>     | 87.29±13.50 <sup>***###&amp;</sup>        |
| Waist-hip ratio                                | 0.86±0.01          | 0.84±0.06 <sup>*</sup>           | 0.89±0.07 <sup>***###</sup>       | 0.91±0.07 <sup>***###&amp;</sup>          |
| sBP (mmHg)                                     | 113.08±13.01       | 113.74±19.14                     | 124.16±18.02 <sup>***###</sup>    | 126.69±16.24 <sup>***###</sup>            |
| dBp (mmHg)                                     | 75.72±9.90         | 74.26±13.08 <sup>*</sup>         | 78.66±10.32 <sup>***</sup>        | 79.83±9.75 <sup>***</sup>                 |
| Triglycerides (mmol/L) <sup>¶</sup>            | 1.35 (0.99-2.05)   | 1.14(0.76-2.22)                  | 1.60(1.08-2.41)                   | 1.70(1.26-2.64) <sup>***###&amp;</sup>    |
| HDL-ch (mmol/L) <sup>¶</sup>                   | 1.21(1.04-1.43)    | 1.08(1.00-1.30)                  | 1.20(1.02-1.49)                   | 1.18(0.97-1.48) <sup>&amp;</sup>          |
| FPG (mmol/L) <sup>§</sup>                      | 5.05±0.32          | 10.91±0.86 <sup>***</sup>        | 9.84±3.99 <sup>***###</sup>       | 9.65±4.02 <sup>***###</sup>               |
| HbA1c (%)                                      | N/A                | 8.57±3.37                        | 9.45±2.55                         | 9.13±2.58                                 |
| Fasting plasma insulin (µU/ml) <sup>¶§</sup>   | 5.66(4.13-9.34)    | N/A                              | 7.22(4.07-12.74)                  | 8.52(5.09-12.84) <sup>***&amp;</sup>      |
| HOMA-IR <sup>¶§</sup>                          | 1.26(0.89-2.10)    | N/A                              | 2.89(1.46-5.29) <sup>***</sup>    | 3.16(1.98-5.65) <sup>***&amp;</sup>       |
| FCP (nmol/L) <sup>¶</sup>                      | N/A                | 0.17(0.08-0.27)                  | 0.72(0.32-1.47) <sup>###</sup>    | 1.17(0.63-2.15) <sup>###&amp;&amp;</sup>  |
| Metabolic syndrome (%)                         | 44.38% (87/196)    | 10.81%(4/37) <sup>**</sup>       | 62.4%(156/250) <sup>***###</sup>  | 69.47(198/285) <sup>***###</sup>          |
| Insulin treatment at diagnosis(%) <sup>†</sup> | N/A                | 94.33%(50/53)                    | 34.0% (85/250) <sup>###</sup>     | 22.81%(65/285) <sup>###&amp;&amp;</sup>   |
| Hs-CRP(mg/L) <sup>¶¶</sup>                     | 0.84(0.39-1.64)    | 0.54(0.30-1.15) <sup>*</sup>     | 1.59(0.74-2.96) <sup>***###</sup> | 1.78(0.82-3.21) <sup>***###</sup>         |
| Adiponectin(ug/ml) <sup>¶¶</sup>               | 6.62(4.14-10.46)   | 6.76(4.38-19.73) <sup>*</sup>    | 4.98(2.40-10.35) <sup>###</sup>   | 4.50(2.74-7.32) <sup>###</sup>            |
| LCN2(ug/L) <sup>¶¶</sup>                       | 23.79(17.60-33.98) | 39.23(22.14-64.73) <sup>**</sup> | 39.68(22.85-71.64) <sup>***</sup> | 46.09(26.15-97.54) <sup>***###&amp;</sup> |
| IL6(pg/ml) <sup>¶¶</sup>                       | 1.40(0.99-2.20)    | 1.72(1.10-3.01) <sup>**</sup>    | 1.80(1.27-3.17) <sup>***</sup>    | 2.27(1.54-4.80) <sup>***###&amp;</sup>    |

Data expressed as Mean ± SEM and compared after Log transformation; Other data expressed by Mean±SD; § Compared after excluding subjects treated by insulin at the sample collection time point; † for LADA and T2D, insulin treatment at diagnosis was less than 1 months then change to oral medicine (follow up at least 6 months to confirm insulin independent); \* Compared with NGT P<0.05, \*\* Compared with NGT P<0.01; \*\*\* Compared with NGT P<0.001; # Compared with T1D P<0.05, ## Compared with T1D P<0.01; ### Compared with T1D P<0.001; & Compared with LADA P<0.05, && Compared with LADA P<0.01, &&& Compared with LADA P<0.001. NGT= Normal Glucose Tolerance subjects, T1D= Type 1 diabetes subjects, T2D = Type 2 diabetes subjects, sBP = systolic blood pressure, dBp = diastolic blood pressure

SUPPLEMENTARY DATA

**Supplementary Table 2.** Adjusted comparisons between LADA, type 1, type 2 diabetes and control groups

| Cytokine/<br>model | LADA vs T1D<br>( ) | LADA vs T2D<br>( ) | T1D vs<br>T2D( ) | NGT vs LADA<br>( ) | NGT vs T1D<br>( ) | NGT vs T2D<br>( ) |
|--------------------|--------------------|--------------------|------------------|--------------------|-------------------|-------------------|
| <b>Hs-CRP</b>      |                    |                    |                  |                    |                   |                   |
| 1                  | 0.328***           | 0.053              | 0.356***         | 0.288***           | -0.123            | 0.335***          |
| 2                  | 0.276***           | 0.060              | 0.301***         | 0.249***           | -0.129*           | 0.294***          |
| 3                  | 0.241***           | 0.034              | 0.256***         | 0.258***           | -0.095            | 0.271***          |
| <b>Adiponectin</b> |                    |                    |                  |                    |                   |                   |
| 1                  | -0.199***          | -0.079             | -0.300***        | -0.139**           | 0.148*            | -0.260***         |
| 2                  | -0.253***          | -0.077             | -0.355***        | -0.163**           | 0.171**           | -0.262***         |
| 3                  | -0.245***          | -0.059             | -0.361***        | -0.172***          | 0.193**           | -0.254***         |
| <b>LCN2</b>        |                    |                    |                  |                    |                   |                   |
| 1                  | 0.075              | 0.111*             | 0.148**          | 0.381***           | 0.237***          | 0.462***          |
| 2                  | 0.094              | 0.109*             | 0.166**          | 0.399***           | 0.229***          | 0.465***          |
| 3                  | 0.081              | 0.106*             | 0.163**          | 0.402***           | 0.224**           | 0.461***          |
| <b>IL6</b>         |                    |                    |                  |                    |                   |                   |
| 1                  | 0.014              | 0.173**            | 0.168*           | 0.248***           | 0.207**           | 0.403***          |
| 2                  | -0.016             | 0.177**            | 0.144            | 0.212***           | 0.209**           | 0.397***          |
| 3                  | 0.009              | 0.181***           | 0.199**          | 0.212***           | 0.200**           | 0.404***          |

Multiple linear regression models were performed for cytokines. Cytokines were entered into the models as log-transformed variables. Model 1: unadjusted; model 2: age and sex; model 3: age, sex and BMI. \*p<0.05; \*\*p<0.01; \*\*\*p<0.001. T1D=type 1 diabetes, T2D= type 2 diabetes, NGT=normal glucose tolerance control subjects

SUPPLEMENTARY DATA

**Supplementary Table 3.** Correlation values for cytokines (for P<0.01 or less) according to clinical, biochemical and immunological parameters and type of diabetes.

|                   | Hs-CRP(mg/L)¶  |     |      |                |                 | Adiponectin (ug/ml)¶ |     |      |                |                 |
|-------------------|----------------|-----|------|----------------|-----------------|----------------------|-----|------|----------------|-----------------|
|                   | NGT            | T1D | LADA | T2D            | Total           | NGT                  | T1D | LADA | T2D            | Total           |
| Waist-hip ratio   | <b>0.24***</b> |     |      |                | <b>0.21***</b>  |                      |     |      |                | <b>-0.16***</b> |
| sBP (mmHg)        |                |     |      |                | <b>0.09**</b>   |                      |     |      |                | <b>-0.13***</b> |
| dBP (mmHg)        |                |     |      |                | <b>0.10**</b>   |                      |     |      |                | <b>-0.13***</b> |
| TG (mmol/L) ¶     |                |     |      |                | <b>0.12***</b>  |                      |     |      | <b>-0.18**</b> | <b>-0.14***</b> |
| HDL-ch (mmol/L) ¶ |                |     |      |                | <b>-0.11**</b>  |                      |     |      |                | <b>0.10**</b>   |
| FPG (mmol/L) \$   |                |     |      |                | <b>0.17***</b>  |                      |     |      |                |                 |
| HbA1c (%)         |                |     |      |                |                 |                      |     |      |                |                 |
| FINS (µU/ml) ¶\$  |                |     |      | <b>0.21***</b> |                 |                      |     |      |                |                 |
| HOMA-IR¶\$        |                |     |      |                | <b>0.22**</b>   |                      |     |      |                | <b>-0.23***</b> |
| HOMA- ¶\$         |                |     |      | <b>0.20**</b>  | <b>0.18***</b>  |                      |     |      |                |                 |
| FCP (nmol/L) ¶    |                |     |      |                |                 |                      |     |      |                |                 |
| MetS (%)          | <b>0.20**</b>  |     |      | <b>0.18**</b>  | <b>0.23***</b>  |                      |     |      |                | <b>-0.18***</b> |
| GADA              |                |     |      |                | <b>-0.15***</b> |                      |     |      |                | <b>0.14**</b>   |

SUPPLEMENTARY DATA

|                      |                |                |                |                |  |  |  |  |  |                 |
|----------------------|----------------|----------------|----------------|----------------|--|--|--|--|--|-----------------|
| Hs-CRP(mg/L)¶¶       |                |                |                | N/A            |  |  |  |  |  | <b>-0.10**</b>  |
| Adiponectin(ug/ml)¶¶ |                |                |                | <b>-0.10**</b> |  |  |  |  |  | N/A             |
| LCN2(ug/L)¶¶         |                |                | <b>0.27***</b> | <b>0.26***</b> |  |  |  |  |  | <b>-0.17***</b> |
| IL6(pg/ml)¶¶         | <b>0.34***</b> | <b>0.33***</b> | <b>0.29***</b> | <b>0.36***</b> |  |  |  |  |  |                 |

¶¶ Data compared after Log transformation.

Partial correlations adjusted age, gender and BMI: \*\*\* P<0.001, \*\* P<0.01.

NGT = Normal Glucose Tolerance, T1D = type 1 diabetes, T2D = type 2 diabetes.

sBP = systolic blood pressure, dBP = diastolic blood pressure, TG = triglycerides, FINS = fasting plasma insulin, MetS = metabolic syndrome.
